# Supplementary material
Source: publisher figshare collection journal article supplement (https://acs.figshare.com/ndownloader/files/4779331)
Supplement: Supplementary file 1 [file 4779331]

## Supporting Information

### **Potent Benzimidazole Sulfonamide PTP1B Inhibitors Containing the Heterocyclic (S)-Isothiazolidinone Phosphotyrosine Mimetic**

Andrew P. Combs,<sup>\*,¶</sup> Wenyu Zhu,<sup>¶</sup> Matthew L. Crawley,<sup>¶</sup> Brian Glass,<sup>¶</sup> Padmaja Polam,<sup>¶</sup> Richard B. Sparks,<sup>¶</sup> Dilip Modi,<sup>¶</sup> Amy Takvorian,<sup>¶</sup> Erin McLaughlin,<sup>¶</sup> Eddy W. Yue,<sup>¶</sup> Zelda Wasserman,<sup>¶</sup> Michael Bower,<sup>¶</sup> Min Wei,<sup>§</sup> Mark Rupar,<sup>§</sup> Paul J. Ala,<sup>§</sup> Brian M. Reid,<sup>§</sup> Dawn Ellis,<sup>§</sup> Lucie Gonneville,<sup>§</sup> Thomas Emm,<sup>‡</sup> Nancy Taylor,<sup>‡</sup> Swamy Yeleswaram,<sup>‡</sup> Yanlong Li,<sup>§</sup> Richard Wynn,<sup>§</sup> Timothy C. Burn,<sup>§</sup> Gregory Hollis,<sup>§</sup> Phillip C.C. Liu,<sup>§</sup> Brian Metcalf

Incyte Corporation, Discovery Chemistry<sup>¶</sup> and Applied Technology,<sup>§</sup> Drug Metabolism,<sup>‡</sup> Experimental Station, Route 141 and Henry Clay Road, Wilmington, DE 19880

<sup>\*</sup>To whom correspondence should be addressed.

Andrew P. Combs, Ph.D.

Discovery Chemistry

Experimental Station, E336/132A

Route 141 and Henry Clay Rd.

Wilmington, DE 19880

Ph: (302)-498-6832

Fax: (302)-425-2708

E-mail: [acombs@incyte.com](mailto:acombs@incyte.com)

## Contents:

### 1-HPLC Purity Analysis

#### 1– HPLC Purity Analysis: HPLC Purity Analysis

HPLC purity was determined to be >95% for all final products by the following two HPCL conditions (See Table below); 1) HPLC method A utilized a Phenomenex Luna C18 column (6 x 75 mm, 3  $\mu$ M particle size), with a gradient of 95% water/0.05% TFA to 5% acetonitrile/0.05% TFA at a flow rate of 1.5 mL/min over a total run time of 7 min. with UV monitoring at 220 nm and 254 nm. 2) HPLC method B utilized a Zorbax Eclipse XDB-C8 column (6 x 50 mm, 3.5  $\mu$ M particle size), with a gradient of 95% water/0.05% TFA to 5% acetonitrile/0.05% TFA at a flow rate of 1.5 mL/min over a total run time of 5 min. with UV monitoring at 225 nm and 254 nm.

| Compound  | Formula               | HPLC Analysis Data                 |
|-----------|-----------------------|------------------------------------|
| <b>2</b>  | $C_{20}H_{20}N_4O_4S$ | Method A: $t_R = 2.23$ min (99.9%) |
|           |                       | Method B: $t_R = 1.74$ min (99.9%) |
| <b>10</b> | $C_{29}H_{29}N_5O_5S$ | Method A: $t_R = 2.99$ min (95.0%) |
|           |                       | Method B: $t_R = 2.27$ min (99.9%) |
| <b>12</b> | $C_{20}H_{20}N_4O_4S$ | Method A: $t_R = 2.23$ min (100%)  |

|            |                              |                                                                          |
|------------|------------------------------|--------------------------------------------------------------------------|
|            |                              | Method B: $t_R = 1.74$ min (100%)                                        |
| <b>14</b>  | $C_{24}H_{22}N_4O_5S_2$      | Method A: $t_R = 2.75$ min (99.7%)<br>Method B: $t_R = 2.25$ min (100%)  |
| <b>16</b>  | $C_{24}H_{21}FN_4O_5S_2$     | Method A: $t_R = 2.84$ min (95.9%)<br>Method B: $t_R = 2.34$ min (99.1%) |
| <b>67a</b> | $C_{24}H_{21}FN_4O_5S_2$     | Method A: $t_R = 2.67$ min (96.9%)<br>Method B: $t_R = 2.19$ min (98.6%) |
| <b>67b</b> | $C_{24}H_{20}F_2N_4O_5S_2$   | Method A: $t_R = 2.77$ min (95.6%)<br>Method B: $t_R = 2.28$ min (97.2%) |
| <b>67c</b> | $C_{25}H_{19}ClF_4N_4O_5S_2$ | Method A: $t_R = 3.66$ min (97.6%)<br>Method B: $t_R = 2.96$ min (98.2%) |
| <b>67d</b> | $C_{20}H_{15}ClF_4N_4O_4S$   | Method A: $t_R = 3.28$ min (98.7%)<br>Method B: $t_R = 2.60$ min (97.8%) |
| <b>79a</b> | $C_{25}H_{24}N_4O_5S_2$      | Method A: $t_R = 2.71$ min (96.0%)<br>Method B: $t_R = 2.27$ min (98.5%) |
| <b>79b</b> | $C_{25}H_{24}N_4O_5S_2$      | Method A: $t_R = 2.82$ min (98.7%)<br>Method B: $t_R = 2.37$ min (99.0%) |
| <b>79c</b> | $C_{26}H_{22}BrF_3N_4O_5S_2$ | Method A: $t_R = 3.32$ min (97.2%)<br>Method B: $t_R = 2.82$ min (99.5%) |

|            |                           |                                                                              |
|------------|---------------------------|------------------------------------------------------------------------------|
| <b>79d</b> | $C_{26}H_{23}N_5O_5S_2$   | Method A: $t_R = 2.69$ min (95.2%)<br><br>Method B: $t_R = 2.82$ min (96.5%) |
| <b>79e</b> | $C_{25}H_{24}ClN_4O_5S_2$ | Method A: $t_R = 3.02$ min (95.1%)<br><br>Method B: $t_R = 2.82$ min (95.5%) |
| <b>87</b>  | $C_{24}H_{21}ClN_4O_5S_2$ | Method A: $t_R = 2.77$ min (97.2%)<br><br>Method B: $t_R = 2.27$ min (98.0%) |
